# Supplementary material for: A Constrained-Total-Least-Squares Method for Joint Estimation of Source and Sensor Locations: A General Framework
Source: Hindawi journal article supplement (doi:10.1155/2018/8475693), 2018-01-01
Supplement: f1 [file 8475693.f1.zip]

Archive with 2 entries (1 files):
- Supplementary Materials/
- Supplementary Materials/mat.8475693.v2.doc
